# Supplementary material
Source: ML conference proceedings conference paper supplement (https://openreview.net/forum?id=N6zS6EgzTw)
Supplement: supplementary_material [file system-overview.pdf › analysis_output/system-fig/system-overview.pdf]

**Mutual Wanting in Human-AI Interaction**  
Empirical Evidence from Large-Scale Analysis of GPT Model Transitions

**User Wants**

- Reliability
- Warmth
- Intelligence
- Creativity
- Honesty
- Helpfulness
- Responsiveness

**System 'Wants'**

- Clarity
- Structure
- Efficiency
- Feedback
- Boundaries
- Patience

**Mutual Wanting Framework (M-WAF)**  
Bidirectional expectation dynamics between users and AI systems

**Reddit Discourse**  
22,411 comments  
4 AI subreddits  
GPT-5 release period

**API Probing**  
729 responses  
9 OpenAI models  
81 probe scenarios

**Representative User Types**

- Creativity-seeking (43.14%)
- Anthropomorphism-focused (11.99%)
- Expectation-violation (9.37%)
- Responsiveness-seeking (9.00%)
- Helpfulness-seeking (6.88%)

**47-Dimensional Feature Extraction**

- Anthropomorphism scoring
  - Trust-betrayal ratios
- Expectation violation detection
- K-means clustering (K=11)
- Dual-algorithm topic modeling

**Model Persona Variations**

- GPT-3.5: Highest warmth (0.14)
- GPT-4: Highest formality (0.22)
- GPT-5: Minimal responses (8 chars)
- Clear personality differences

**Key Empirical Findings**

- 48.65% anthropomorphism rate
  - 11.9:1 trust-to-betrayal ratio
  - 11 distinct user types identified
- Measurable expectation violations (2.23%)
- GPT-5 impact: -0.044 sentiment change

**Practical Applications**

- Expectation violation detection
- Trust calibration monitoring
- Anthropomorphism-aware design
  - User type personalization
- Model transition management
